# Supplementary material for: Solubilization, purification, and ligand binding characterization of G protein-coupled receptor SMO in native membrane bilayer using styrene maleic acid copolymer
Source: PeerJ. 2022 May 3;10:e13381. doi: 10.7717/peerj.13381 (PMC9074879; doi:10.7717/peerj.13381)
Supplement: Supplemental Information 5 [file peerj-10-13381-s005.xlsx]

## Sheet: Sheet1
volume（ml）	A280
0.00131989	0.066
0.00798988	0.0685
0.0208492	0.0755
0.0213203	0.08
0.0280418	0.085
0.0346508	0.0865
0.0413208	0.088
0.0479889	0.088
0.0546513	0.0885
0.0613213	0.0875
0.0679894	0.0855
0.0746574	0.084
0.0813198	0.0835
0.0879898	0.0825
0.0947399	0.08
0.101326	0.077
0.10799	0.076
0.114658	0.076
0.121326	0.075
0.127991	0.0715
0.134659	0.069
0.141327	0.0675
0.147989	0.066
0.154659	0.088
0.161327	0.1665
0.16799	0.2605
0.174658	0.3255
0.181326	0.3545
0.187994	0.361
0.194658	0.359
0.201326	0.3475
0.207994	0.332
0.214659	0.319
0.221327	0.303
0.227995	0.2875
0.234659	0.276
0.241327	0.264
0.247995	0.254
0.254658	0.243
0.261328	0.2315
0.267994	0.2225
0.274664	0.216
0.281326	0.207
0.287996	0.1995
0.294662	0.198
0.301327	0.196
0.307995	0.1935
0.314663	0.1895
0.321327	0.187
0.327993	0.1855
0.334663	0.185
0.341326	0.1825
0.347996	0.179
0.354664	0.1765
0.361332	0.1755
0.367994	0.1725
0.374662	0.169
0.381327	0.169
0.388001	0.165
0.394663	0.1625
0.401331	0.1615
0.407995	0.158
0.414663	0.155
0.421331	0.1505
0.427994	0.1485
0.434664	0.147
0.441332	0.1465
0.447994	0.1435
0.454662	0.1405
0.46133	0.1385
0.467998	0.135
0.474663	0.1325
0.481331	0.1325
0.487999	0.1295
0.494663	0.129
0.501331	0.1265
0.507999	0.1235
0.514662	0.124
0.521332	0.122
0.527998	0.123
0.534662	0.1225
0.54133	0.1205
0.547998	0.119
0.554663	0.118
0.561331	0.117
0.567999	0.1155
0.574663	0.116
0.581331	0.1135
0.587999	0.114
0.594667	0.114
0.601332	0.112
0.608	0.1135
0.614668	0.1115
0.621332	0.111
0.628	0.112
0.634668	0.1105
0.641264	0.109
0.647997	0.1105
0.6546	0.1105
0.661329	0.1105
0.667933	0.11
0.674666	0.1085
0.681265	0.1095
0.687998	0.11
0.694601	0.1095
0.701334	0.107
0.707933	0.1085
0.714666	0.1085
0.72127	0.1095
0.727999	0.109
0.734598	0.109
0.741335	0.108
0.747995	0.109
0.754667	0.109
0.761335	0.1095
0.768003	0.1075
0.774668	0.1075
0.781336	0.109
0.787931	0.109
0.794664	0.11
0.801268	0.109
0.808004	0.1095
0.8146	0.1095
0.821333	0.11
0.827928	0.1085
0.834665	0.1075
0.841268	0.107
0.848001	0.107
0.854605	0.1065
0.861334	0.107
0.867937	0.107
0.87467	0.108
0.88127	0.1075
0.888002	0.1075
0.894606	0.1075
0.901335	0.1085
0.907938	0.1085
0.914671	0.1085
0.921267	0.1085
0.928003	0.1085
0.934603	0.1085
0.941336	0.109
0.947935	0.1075
0.954672	0.108
0.961268	0.1085
0.968	0.1095
0.974604	0.108
0.98134	0.108
0.987936	0.108
0.994673	0.109
1.00127	0.1095
1.008	0.11
1.0146	0.111
1.02134	0.1085
1.02794	0.1095
1.03467	0.111
1.04127	0.111
1.048	0.111
1.05461	0.11
1.06134	0.1115
1.06793	0.112
1.07467	0.112
1.08127	0.112
1.08801	0.1115
1.0946	0.1115
1.10134	0.1095
1.10794	0.111
1.11467	0.111
1.12127	0.1115
1.128	0.112
1.1346	0.112
1.14134	0.112
1.14794	0.1115
1.15467	0.1125
1.16127	0.113
1.16801	0.1135
1.1746	0.1145
1.18134	0.114
1.18794	0.113
1.19467	0.113
1.20127	0.112
1.20801	0.111
1.2146	0.1105
1.22134	0.1115
1.22794	0.1125
1.23467	0.112
1.24127	0.1135
1.24801	0.1135
1.25461	0.1125
1.26134	0.114
1.26794	0.114
1.27468	0.1135
1.28127	0.113
1.28801	0.1135
1.29461	0.114
1.30134	0.115
1.30794	0.115
1.31468	0.1135
1.32128	0.114
1.32801	0.113
1.33461	0.112
1.34135	0.111
1.34794	0.112
1.35468	0.1135
1.36127	0.114
1.36801	0.115
1.37461	0.115
1.38134	0.1145
1.38794	0.1135
1.39467	0.115
1.40128	0.115
1.40801	0.1145
1.41461	0.115
1.42134	0.1145
1.42794	0.115
1.43469	0.115
1.44128	0.116
1.44801	0.116
1.45461	0.117
1.46134	0.1165
1.46794	0.1165
1.47468	0.1165
1.48128	0.1175
1.48801	0.1165
1.49461	0.116
1.50134	0.116
1.50794	0.116
1.51461	0.116
1.52128	0.116
1.52801	0.116
1.53461	0.1155
1.54135	0.1165
1.54794	0.1165
1.55468	0.1155
1.56128	0.1155
1.56801	0.1155
1.57461	0.115
1.58134	0.116
1.58795	0.1165
1.59468	0.1165
1.60128	0.117
1.60801	0.1165
1.61461	0.1165
1.62135	0.117
1.62794	0.117
1.63468	0.116
1.64128	0.1165
1.64802	0.117
1.65461	0.118
1.66135	0.118
1.66794	0.119
1.67461	0.1185
1.68128	0.1175
1.68794	0.1185
1.69461	0.1185
1.70128	0.119
1.70795	0.118
1.71461	0.1175
1.72128	0.1175
1.72795	0.119
1.73461	0.12
1.74128	0.1195
1.74795	0.12
1.75461	0.12
1.76128	0.1195
1.76795	0.1205
1.77461	0.12
1.78128	0.121
1.78795	0.1205
1.79462	0.12
1.80128	0.1205
1.80795	0.12
1.81462	0.121
1.82128	0.1205
1.82795	0.1215
1.83462	0.12
1.84128	0.12
1.84795	0.121
1.85462	0.121
1.86128	0.1205
1.86795	0.1215
1.87462	0.1225
1.88128	0.1215
1.88795	0.1215
1.89462	0.1215
1.90128	0.1215
1.90795	0.1225
1.91462	0.1215
1.92128	0.123
1.92795	0.123
1.93462	0.123
1.94129	0.1235
1.94795	0.124
1.95462	0.123
1.96129	0.1225
1.96795	0.1225
1.97462	0.122
1.98128	0.1225
1.98795	0.123
1.99462	0.123
2.00128	0.124
2.00795	0.1225
2.01462	0.123
2.02128	0.124
2.02795	0.126
2.03462	0.1255
2.04128	0.1255
2.04795	0.1235
2.05462	0.1225
2.06128	0.1235
2.06795	0.1235
2.07462	0.124
2.08128	0.1245
2.08795	0.1245
2.09461	0.1255
2.10129	0.1245
2.10795	0.124
2.11462	0.124
2.12128	0.124
2.12795	0.1245
2.13462	0.126
2.14128	0.126
2.14796	0.1255
2.15462	0.126
2.16128	0.127
2.16796	0.126
2.17462	0.126
2.18128	0.127
2.18795	0.1265
2.19462	0.126
2.20128	0.127
2.20795	0.128
2.21462	0.1275
2.22129	0.126
2.22795	0.1265
2.23462	0.126
2.24129	0.127
2.24795	0.1285
2.25462	0.1285
2.26129	0.129
2.26795	0.128
2.27462	0.1285
2.28129	0.127
2.28795	0.1265
2.29462	0.1255
2.30129	0.124
2.30795	0.124
2.31462	0.1225
2.32129	0.123
2.32795	0.1225
2.33462	0.1235
2.34129	0.1235
2.34796	0.1225
2.35462	0.121
2.36129	0.122
2.36796	0.121
2.37462	0.1205
2.38129	0.118
2.38796	0.1175
2.39462	0.118
2.40129	0.117
2.40796	0.1165
2.41463	0.115
2.42129	0.114
2.42796	0.1125
2.43463	0.1115
2.44129	0.1105
2.44796	0.1105
2.45463	0.11
2.46129	0.1095
2.46795	0.1085
2.47462	0.106
2.48129	0.1065
2.48795	0.1055
2.49463	0.104
2.50129	0.1045
2.50796	0.1025
2.51462	0.101
2.52129	0.1
2.52796	0.1015
2.53462	0.0995
2.54129	0.0975
2.54796	0.097
2.55463	0.095
2.56129	0.095
2.56796	0.094
2.57463	0.0935
2.59175	0.092
2.59842	0.0915
2.60509	0.0915
2.61176	0.091
2.61842	0.09
2.62509	0.0905
2.63176	0.0895
2.63843	0.088
2.64509	0.088
2.65176	0.0885
2.65843	0.088
2.66509	0.0865
2.67176	0.086
2.67843	0.086
2.68509	0.085
2.69176	0.0835
2.69842	0.0815
2.70509	0.081
2.71176	0.0805
2.71842	0.0805
2.72509	0.0795
2.73176	0.0785
2.73842	0.0775
2.74509	0.0775
2.75176	0.0765
2.75836	0.075
2.76509	0.0745
2.77169	0.0725
2.77842	0.073
2.78503	0.0715
2.79176	0.071
2.79836	0.0705
2.80509	0.069
2.81169	0.068
2.81843	0.069
2.82503	0.069
2.83176	0.0685
2.83836	0.0665
2.8451	0.067
2.85169	0.0665
2.85842	0.0655
2.86503	0.066
2.87176	0.066
2.87836	0.0645
2.88509	0.0635
2.89169	0.0625
2.89843	0.0605
2.90503	0.059
2.91176	0.0585
2.91836	0.058
2.92509	0.056
2.9317	0.0535
2.93842	0.0535
2.94503	0.0525
2.95176	0.0515
2.95836	0.0495
2.96509	0.0485
2.97169	0.0485
2.97842	0.048
2.98502	0.047
2.99176	0.046
2.99836	0.0455
3.00509	0.045
3.01171	0.044
3.01842	0.0445
3.02504	0.043
3.03176	0.0435
3.03844	0.0425
3.04512	0.0425
3.05178	0.0425
3.05851	0.043
3.0651	0.0435
3.07176	0.0435
3.07836	0.044
3.0851	0.0435
3.09169	0.0455
3.09843	0.0465
3.10503	0.0445
3.11177	0.044
3.11836	0.045
3.1251	0.045
3.1317	0.0445
3.13843	0.0455
3.14503	0.0445
3.15177	0.0445
3.15836	0.0445
3.1651	0.0445
3.1717	0.045
3.17843	0.0455
3.18503	0.0455
3.19177	0.047
3.19836	0.047
3.2051	0.0485
3.2117	0.0485
3.21843	0.048
3.22798	0.0465
3.23176	0.0465
3.23837	0.0465
3.2451	0.0475
3.2517	0.0475
3.25843	0.048
3.26503	0.0475
3.27176	0.0475
3.27837	0.047
3.2851	0.048
3.2917	0.048
3.29843	0.0475
3.30503	0.046
3.3117	0.047
3.31837	0.0465
3.32503	0.0475
3.3317	0.0465
3.33837	0.047
3.34503	0.047
3.3517	0.047
3.35837	0.047
3.36503	0.048
3.3717	0.048
3.37837	0.0485
3.38503	0.048
3.3917	0.047
3.39837	0.0465
3.40503	0.047
3.41169	0.047
3.41837	0.048
3.42503	0.0485
3.4317	0.0485
3.43836	0.0485
3.44504	0.048
3.4517	0.049
3.45836	0.0495
3.46503	0.05
3.4717	0.05
3.47837	0.0505
3.48798	0.0505
3.4917	0.051
3.49837	0.0515
3.50503	0.0505
3.5117	0.0515
3.51837	0.052
3.52503	0.0535
3.5317	0.053
3.53837	0.053
3.54503	0.0535
3.5517	0.0535
3.55837	0.0535
3.56503	0.054
3.5717	0.055
3.57837	0.055
3.58503	0.056
3.5917	0.0565
3.59837	0.057
3.60503	0.0555
3.6117	0.0565
3.61837	0.0575
3.62503	0.057
3.6317	0.0575
3.63837	0.059
3.64504	0.0585
3.6517	0.059
3.65837	0.0595
3.66503	0.059
3.6717	0.0595
3.67837	0.06
3.68504	0.061
3.6917	0.061
3.69837	0.061
3.70504	0.0615
3.7117	0.0625
3.71837	0.0645
3.72504	0.0645
3.73171	0.064
3.73837	0.0645
3.74798	0.0645
3.75171	0.0655
3.75837	0.067
3.76504	0.0685
3.7717	0.07
3.77838	0.0695
3.78504	0.0685
3.79171	0.069
3.79837	0.069
3.80504	0.0685
3.81171	0.0685
3.81837	0.0685
3.82504	0.069
3.83171	0.0695
3.83837	0.069
3.84504	0.071
3.85171	0.0715
3.85838	0.0705
3.86504	0.0695
3.87171	0.07
3.87837	0.071
3.88504	0.072
3.89171	0.0725
3.89837	0.071
3.90504	0.072
3.91171	0.072
3.91838	0.0725
3.92504	0.072
3.93171	0.0715
3.93838	0.071
3.94504	0.0725
3.95171	0.0725
3.95838	0.072
3.96504	0.073
3.97171	0.074
3.97838	0.075
3.98504	0.0755
3.99171	0.0765
3.99838	0.075
4.00504	0.0745
4.01171	0.0755
4.01837	0.0755
4.02504	0.0755
4.03171	0.076
4.03837	0.0755
4.04504	0.076
4.05171	0.077
4.05837	0.078
4.06504	0.078
4.07171	0.0775
4.07838	0.0785
4.08504	0.08
4.09171	0.0805
4.09837	0.081
4.10504	0.081
4.11171	0.0815
4.11838	0.0815
4.12504	0.0825
4.13171	0.0825
4.13837	0.0815
4.14504	0.082
4.15171	0.0825
4.15837	0.083
4.16505	0.082
4.17171	0.0825
4.17838	0.0835
4.18504	0.084
4.19171	0.0845
4.19838	0.0855
4.20504	0.087
4.21171	0.0865
4.21838	0.087
4.22504	0.0865
4.23171	0.0875
4.23838	0.0875
4.24504	0.087
4.25171	0.0875
4.25838	0.088
4.26504	0.0875
4.27171	0.0875
4.28132	0.088
4.28505	0.088
4.29171	0.0885
4.29838	0.0885
4.30505	0.0895
4.31171	0.089
4.31838	0.089
4.32505	0.09
4.33171	0.09
4.33838	0.0905
4.34505	0.092
4.35171	0.0915
4.35838	0.09
4.36505	0.0905
4.37171	0.09
4.37838	0.09
4.38505	0.0885
4.39171	0.0885
4.39838	0.089
4.40505	0.0895
4.41172	0.0885
4.41838	0.089
4.42505	0.0895
4.43171	0.091
4.43838	0.0895
4.44505	0.0905
4.45172	0.0905
4.45838	0.0905
4.46505	0.092
4.47172	0.092
4.47838	0.091
4.48505	0.0925
4.49172	0.092
4.49838	0.0925
4.50504	0.092
4.51172	0.0935
4.51839	0.0945
4.52505	0.094
4.53172	0.093
4.53838	0.093
4.5479	0.093
4.55171	0.0925
4.55838	0.0935
4.56505	0.093
4.57171	0.0945
4.57838	0.0955
4.58505	0.0955
4.59171	0.0955
4.59838	0.0965
4.60505	0.0965
4.61172	0.0965
4.61838	0.096
4.62505	0.0965
4.63172	0.0955
4.63838	0.0955
4.64505	0.096
4.65172	0.097
4.65838	0.097
4.66505	0.0975
4.67172	0.097
4.67838	0.0975
4.68505	0.0985
4.69172	0.098
4.69838	0.0985
4.70505	0.098
4.71172	0.0985
4.71838	0.1
4.72505	0.1
4.73172	0.1
4.73838	0.1
4.74505	0.1005
4.75172	0.1
4.75838	0.1
4.76505	0.1005
4.77172	0.1005
4.77839	0.0995
4.78505	0.1005
4.79172	0.0995
4.79839	0.1
4.80505	0.101
4.81172	0.101
4.81839	0.1015
4.82506	0.1015
4.83173	0.1015
4.8384	0.101
4.84506	0.1015
4.85172	0.103
4.8584	0.1025
4.86505	0.1035
4.87173	0.1035
4.87839	0.1035
4.88506	0.1035
4.89173	0.104
4.8984	0.1045
4.90506	0.104
4.91173	0.1045
4.9184	0.104
4.92507	0.1045
4.93172	0.1045
4.93832	0.1055
4.94505	0.105
4.95166	0.1045
4.95839	0.1055
4.96499	0.107
4.97172	0.107
4.97832	0.1075
4.98506	0.1085
4.99165	0.109
4.99832	0.109
5.00507	0.109
5.01166	0.11
5.0184	0.111
5.025	0.1115
5.03172	0.111
5.0384	0.1105
5.04506	0.111
5.05167	0.1115
5.05839	0.1115
5.065	0.1125
5.07167	0.1115
5.07833	0.1135
5.085	0.1135
5.09167	0.1125
5.09833	0.1125
5.105	0.1145
5.11167	0.114
5.12139	0.1135
5.125	0.1145
5.13167	0.1135
5.13834	0.115
5.145	0.115
5.15167	0.1155
5.15834	0.1155
5.16506	0.115
5.17167	0.1155
5.17839	0.116
5.18499	0.116
5.19172	0.116
5.19832	0.117
5.20505	0.1165
5.21166	0.116
5.21839	0.1165
5.22499	0.1185
5.23166	0.1185
5.23832	0.118
5.24499	0.118
5.25166	0.118
5.25833	0.1185
5.26499	0.118
5.27166	0.1195
5.27833	0.1195
5.28499	0.119
5.29166	0.119
5.29833	0.1205
5.30499	0.12
5.31167	0.1205
5.31834	0.121
5.32501	0.121
5.33174	0.1215
5.33834	0.122
5.34501	0.1225
5.35174	0.123
5.35834	0.1235
5.365	0.1235
5.37174	0.123
5.37834	0.122
5.38499	0.1225
5.39168	0.122
5.39834	0.123
5.40501	0.124
5.41168	0.124
5.41834	0.1235
5.42499	0.1225
5.43166	0.1215
5.43833	0.1215
5.445	0.1205
5.45166	0.12
5.45833	0.119
5.46499	0.1185
5.47166	0.118
5.47833	0.1165
5.48499	0.116
5.49166	0.1145
5.49833	0.1155
5.505	0.1145
5.51166	0.114
5.51833	0.113
5.525	0.1125
5.53166	0.1125
5.53833	0.1125
5.545	0.112
5.55456	0.111
5.55833	0.1115
5.565	0.1105
5.57166	0.109
5.57833	0.108
5.585	0.108
5.59166	0.107
5.59833	0.1055
5.605	0.1045
5.61167	0.1035
5.61833	0.1035
5.625	0.1025
5.63167	0.102
5.63833	0.102
5.64499	0.1015
5.65167	0.1005
5.65834	0.1005
5.665	0.1005
5.67166	0.1
5.67833	0.099
5.685	0.0995
5.69166	0.0995
5.69833	0.0995
5.705	0.099
5.71166	0.098
5.71833	0.0975
5.725	0.098
5.73166	0.096
5.73834	0.0945
5.745	0.093
5.75167	0.092
5.75833	0.091
5.765	0.09
5.77167	0.0885
5.77833	0.0865
5.785	0.086
5.79167	0.0845
5.79833	0.0835
5.80501	0.083
5.81168	0.082
5.81835	0.082
5.82501	0.0815
5.83168	0.0815
5.83833	0.081
5.84502	0.08
5.85168	0.0805
5.86148	0.08
5.86501	0.0815
5.87167	0.0805
5.87833	0.0785
5.88501	0.0775
5.89168	0.078
5.89834	0.0775
5.90502	0.0775
5.91167	0.0765
5.91833	0.0775
5.925	0.0775
5.93167	0.0775
5.93834	0.0775
5.945	0.0775
5.95167	0.0775
5.95833	0.0775
5.965	0.0785
5.97167	0.0785
5.97835	0.079
5.98501	0.0795
5.99168	0.079
5.99834	0.08
6.00501	0.0795
6.01167	0.0785
6.01834	0.079
6.02501	0.0785
6.03465	0.0765
6.03834	0.077
6.04502	0.0755
6.05167	0.076
6.05834	0.075
6.065	0.0745
6.07168	0.0735
6.07834	0.0725
6.08501	0.0715
6.09167	0.07
6.09835	0.068
6.10501	0.068
6.11167	0.067
6.11835	0.067
6.12501	0.0685
6.13167	0.0685
6.13835	0.069
6.14501	0.067
6.15167	0.0675
6.15834	0.0685
6.16501	0.069
6.17167	0.0695
6.17833	0.069
6.18501	0.0685
6.19167	0.069
6.19834	0.07
6.205	0.0715
6.21168	0.071
6.21834	0.071
6.225	0.072
6.23167	0.0725
6.23834	0.0725
6.245	0.074
6.25167	0.0745
6.25834	0.0745
6.26501	0.0755
6.27465	0.075
6.27834	0.076
6.28501	0.077
6.29167	0.079
6.29834	0.08
6.30501	0.082
6.31167	0.082
6.31834	0.0835
6.32501	0.084
6.33167	0.086
6.33834	0.088
6.34501	0.089
6.35168	0.0915
6.35834	0.0925
6.365	0.0925
6.37167	0.093
6.37834	0.0955
6.38501	0.0965
6.39167	0.0985
6.39834	0.1
6.40501	0.1005
6.41167	0.102
6.41834	0.104
6.42501	0.105
6.43167	0.107
6.43834	0.11
6.445	0.112
6.45167	0.1145
6.45834	0.116
6.46501	0.117
6.47167	0.1195
6.47834	0.12
6.48501	0.1215
6.49167	0.1225
6.49834	0.124
6.50501	0.126
6.51168	0.1275
6.51834	0.1285
6.52501	0.1295
6.53168	0.131
6.53837	0.133
6.54501	0.1345
6.55168	0.1375
6.55834	0.1395
6.56502	0.1415
6.57168	0.1435
6.57836	0.1465
6.58806	0.1495
6.59168	0.1505
6.59835	0.153
6.60501	0.155
6.61168	0.157
6.61834	0.159
6.62501	0.1615
6.63168	0.1635
6.63837	0.1655
6.64501	0.168
6.65168	0.171
6.65835	0.1735
6.66501	0.176
6.67168	0.1795
6.67835	0.1825
6.68494	0.1865
6.69168	0.1905
6.69828	0.194
6.70502	0.1975
6.71161	0.2015
6.71835	0.204
6.72495	0.206
6.73168	0.2085
6.73828	0.212
6.74501	0.214
6.75161	0.2165
6.75835	0.2205
6.76501	0.2255
6.77168	0.2285
6.77834	0.233
6.78501	0.2375
6.79168	0.2425
6.79835	0.2475
6.80501	0.253
6.81168	0.258
6.81835	0.262
6.82501	0.269
6.83168	0.274
6.83835	0.2785
6.84495	0.2825
6.85168	0.2875
6.85828	0.2915
6.86501	0.296
6.87161	0.302
6.87834	0.3055
6.88495	0.309
6.89168	0.315
6.89828	0.32
6.90501	0.327
6.91162	0.333
6.91835	0.341
6.92495	0.3485
6.93168	0.356
6.93828	0.3625
6.94502	0.3705
6.95162	0.378
6.95835	0.3845
6.96495	0.3895
6.97168	0.394
6.97829	0.401
6.98501	0.4075
6.99161	0.4145
6.99835	0.421
7.00495	0.4275
7.01457	0.435
7.01828	0.4435
7.02502	0.451
7.03161	0.459
7.03835	0.468
7.04495	0.4775
7.05169	0.487
7.05828	0.498
7.06502	0.509
7.07162	0.5195
7.07835	0.5275
7.08495	0.5355
7.09168	0.543
7.09828	0.551
7.10502	0.56
7.11161	0.5695
7.11835	0.577
7.12495	0.5835
7.13169	0.591
7.13828	0.6
7.14502	0.611
7.15162	0.6225
7.15835	0.635
7.16495	0.6475
7.17162	0.66
7.17828	0.6715
7.18495	0.686
7.19162	0.6985
7.19828	0.7105
7.20495	0.7215
7.21162	0.731
7.21829	0.741
7.22495	0.7525
7.23162	0.7615
7.23829	0.7725
7.24495	0.783
7.25162	0.793
7.25829	0.805
7.26495	0.817
7.27162	0.829
7.27829	0.843
7.28495	0.8575
7.29162	0.8715
7.29829	0.887
7.30495	0.9055
7.31162	0.9235
7.31829	0.94
7.32495	0.9545
7.33162	0.968
7.33829	0.981
7.34496	0.9925
7.35163	1.004
7.3583	1.017
7.36495	1.0295
7.37162	1.038
7.3783	1.0505
7.38495	1.066
7.39162	1.082
7.39829	1.0995
7.40496	1.1195
7.41162	1.138
7.41829	1.1565
7.42495	1.1765
7.43162	1.197
7.43829	1.215
7.44496	1.2335
7.45162	1.2485
7.45829	1.262
7.46496	1.275
7.47162	1.29
7.47829	1.305
7.48496	1.322
7.49162	1.334
7.49829	1.3455
7.50496	1.3605
7.51163	1.377
7.52131	1.395
7.52496	1.415
7.53163	1.4375
7.53829	1.4615
7.54495	1.4875
7.55163	1.5145
7.55829	1.54
7.56496	1.564
7.57162	1.5825
7.57829	1.598
7.58495	1.614
7.59162	1.6285
7.59829	1.646
7.60496	1.6625
7.61162	1.68
7.61829	1.6925
7.62496	1.709
7.63162	1.729
7.63829	1.7505
7.64496	1.7775
7.65163	1.804
7.65829	1.8315
7.66496	1.857
7.67162	1.885
7.67829	1.915
7.68495	1.9415
7.69162	1.9685
7.69829	1.99
7.70496	2.0065
7.71162	2.024
7.71829	2.0425
7.72496	2.0625
7.73162	2.0825
7.73829	2.097
7.74496	2.11
7.75163	2.128
7.75829	2.151
7.76496	2.1755
7.77164	2.203
7.77832	2.2325
7.78497	2.263
7.79164	2.296
7.79829	2.334
7.80499	2.366
7.81164	2.395
7.8183	2.4195
7.82496	2.4375
7.83166	2.4575
7.83829	2.4775
7.84496	2.4995
7.85163	2.5235
7.85832	2.5455
7.86497	2.558
7.87163	2.577
7.87829	2.601
7.88497	2.631
7.89163	2.6645
7.89829	2.7
7.90496	2.732
7.91163	2.7655
7.91829	2.8005
7.92496	2.8415
7.93163	2.8795
7.93831	2.9115
7.94496	2.935
7.95163	2.9555
7.9583	2.9765
7.96496	2.998
7.97163	3.0195
7.9783	3.0415
7.98496	3.0525
7.99163	3.0685
8.00131	3.0925
8.00497	3.12
8.01163	3.15
8.0183	3.1865
8.02496	3.226
8.03163	3.2655
8.0383	3.309
8.04497	3.3555
8.05163	3.3965
8.05829	3.433
8.06496	3.46
8.07163	3.48
8.0783	3.501
8.08496	3.522
8.09163	3.5425
8.0983	3.5655
8.10496	3.5855
8.11163	3.5995
8.1183	3.622
8.12496	3.651
8.13163	3.687
8.1383	3.7265
8.14496	3.771
8.15163	3.8125
8.1583	3.855
8.16497	3.9015
8.17163	3.9495
8.1783	3.9885
8.18497	4.0235
8.19163	4.0465
8.1983	4.0675
8.20496	4.093
8.21163	4.117
8.2183	4.145
8.22496	4.1755
8.23163	4.186
8.2383	4.2035
8.24497	4.229
8.25163	4.263
8.2583	4.3015
8.26497	4.347
8.27163	4.394
8.2783	4.442
8.28491	4.494
8.29163	4.5495
8.29825	4.5935
8.30497	4.635
8.31464	4.6645
8.3183	4.689
8.32492	4.7125
8.33163	4.7355
8.33825	4.758
8.34497	4.785
8.35158	4.802
8.3583	4.815
8.36492	4.8395
8.37164	4.8715
8.3783	4.9105
8.38497	4.9605
8.39164	5.0135
8.3983	5.06
8.40497	5.111
8.41163	5.1655
8.4183	5.2235
8.42497	5.2725
8.43163	5.3095
8.4383	5.335
8.4449	5.36
8.45163	5.3875
8.45823	5.414
8.46497	5.4465
8.47157	5.477
8.4783	5.4815
8.4849	5.4985
8.49164	5.5245
8.49824	5.5625
8.50497	5.603
8.51158	5.6535
8.5183	5.7025
8.52491	5.754
8.53164	5.812
8.53825	5.875
8.54497	5.927
8.55158	5.974
8.55831	6.006
8.5649	6.03
8.57164	6.055
8.57825	6.081
8.58497	6.1085
8.59158	6.1385
8.59831	6.148
8.60492	6.1585
8.61163	6.182
8.61824	6.218
8.62497	6.2615
8.63157	6.3125
8.6383	6.365
8.64491	6.4165
8.65164	6.4745
8.65824	6.5325
8.66497	6.595
8.67157	6.651
8.6783	6.694
8.68491	6.7205
8.69164	6.7465
8.69824	6.777
8.70497	6.807
8.71157	6.841
8.7183	6.8715
8.7249	6.874
8.73164	6.892
8.73824	6.9245
8.74497	6.97
8.75157	7.0195
8.7583	7.081
8.76492	7.1415
8.77164	7.207
8.77824	7.276
8.78498	7.3455
8.79157	7.403
8.79831	7.449
8.80491	7.477
8.81164	7.4995
8.81826	7.5305
8.82497	7.559
8.83158	7.593
8.83831	7.6295
8.8449	7.6445
8.85164	7.669
8.85824	7.7095
8.86498	7.76
8.87157	7.814
8.87831	7.8755
8.88491	7.939
8.89164	8.002
8.89824	8.074
8.90498	8.1545
8.91157	8.2315
8.91831	8.2995
8.92491	8.3535
8.93164	8.387
8.93824	8.4285
8.94497	8.475
8.95157	8.5165
8.95831	8.56
8.96491	8.6005
8.97164	8.6135
8.97824	8.6455
8.98498	8.7015
8.99159	8.77
8.99831	8.849
9.00491	8.9385
9.01164	9.0285
9.01825	9.1255
9.02498	9.217
9.03158	9.3155
9.0383	9.4035
9.04491	9.484
9.05165	9.5395
9.05824	9.5885
9.06498	9.6455
9.07158	9.7025
9.07831	9.757
9.08491	9.822
9.09165	9.863
9.09825	9.9155
9.10498	9.9935
9.11158	10.0895
9.11831	10.1915
9.12491	10.305
9.13164	10.414
9.13825	10.5255
9.14498	10.6515
9.15158	10.7945
9.15831	10.9315
9.16492	11.052
9.17165	11.1475
9.17825	11.2115
9.18498	11.276
9.19158	11.348
9.19831	11.4255
9.20491	11.5095
9.21164	11.584
9.21824	11.6295
9.22498	11.6995
9.23158	11.802
9.23831	11.922
9.24491	12.0575
9.25165	12.212
9.25825	12.3675
9.26498	12.5235
9.27158	12.681
9.27831	12.8425
9.28491	12.9905
9.29166	13.1205
9.29825	13.211
9.30498	13.284
9.31158	13.365
9.31831	13.4575
9.32492	13.5615
9.33165	13.6785
9.33824	13.764
9.34498	13.8585
9.35158	13.985
9.35825	14.1365
9.36492	14.3
9.37158	14.4735
9.37825	14.6495
9.38491	14.8275
9.39158	15.02
9.39825	15.231
9.40491	15.4375
9.41158	15.6195
9.41825	15.764
9.42491	15.8725
9.43158	15.9835
9.43825	16.1015
9.44491	16.2195
9.45791	16.343
9.45825	16.449
9.46492	16.533
9.47158	16.653
9.47825	16.816
9.48492	17.0065
9.49158	17.2225
9.49825	17.4565
9.50491	17.685
9.51158	17.9055
9.51825	18.126
9.52492	18.3565
9.53158	18.5665
9.53825	18.7515
9.54492	18.883
9.55158	18.9945
9.55825	19.1125
9.56492	19.2395
9.57159	19.3795
9.57825	19.5305
9.58492	19.6465
9.59158	19.779
9.59825	19.9565
9.60492	20.1685
9.61159	20.3905
9.61825	20.621
9.62492	20.851
9.63158	21.0895
9.63825	21.3465
9.64494	21.6275
9.65159	21.897
9.65825	22.134
9.66492	22.307
9.67159	22.432
9.67826	22.5615
9.68492	22.7025
9.69159	22.8755
9.69826	23.06
9.70492	23.1965
9.71159	23.3085
9.71826	23.4575
9.72492	23.66
9.73159	23.897
9.73825	24.1605
9.74492	24.4325
9.75159	24.696
9.75825	24.962
9.76499	25.229
9.77158	25.4835
9.77825	25.712
9.78492	25.9075
9.79159	26.0405
9.79825	26.1595
9.80492	26.294
9.81159	26.45
9.81825	26.636
9.82492	26.8355
9.83158	26.994
9.83826	27.178
9.84492	27.399
9.85159	27.6375
9.85825	27.8855
9.86492	28.156
9.87159	28.428
9.87826	28.7085
9.88492	29.0065
9.89159	29.3155
9.89825	29.593
9.90492	29.8295
9.91159	30.003
9.91825	30.142
9.92492	30.2845
9.93159	30.4275
9.93825	30.58
9.94492	30.7385
9.95159	30.856
9.95825	30.988
9.96492	31.1705
9.97159	31.4105
9.97826	31.685
9.98492	31.9855
9.99159	32.2855
9.99826	32.575
10.0049	32.866
10.0116	33.1595
10.0183	33.4485
10.0249	33.717
10.0316	33.9285
10.0383	34.0725
10.0449	34.2105
10.0516	34.3595
10.0583	34.523
10.0649	34.71
10.0716	34.891
10.0783	35.04
10.0849	35.22
10.0916	35.4325
10.0983	35.6705
10.1049	35.924
10.1116	36.1955
10.1183	36.463
10.1249	36.7445
10.1316	37.043
10.1383	37.3485
10.1449	37.6275
10.1516	37.8635
10.1583	38.0305
10.1649	38.169
10.1716	38.3175
10.1783	38.47
10.1849	38.615
10.1916	38.7695
10.1983	38.8905
10.2049	39.0405
10.2116	39.24
10.2183	39.477
10.2249	39.7505
10.2316	40.043
10.2383	40.336
10.2449	40.6065
10.2516	40.882
10.2583	41.1725
10.265	41.4415
10.2716	41.6905
10.2783	41.8835
10.2849	42.011
10.2916	42.1285
10.2983	42.266
10.3049	42.426
10.3116	42.595
10.3183	42.764
10.3249	42.916
10.3316	43.0925
10.3383	43.2905
10.3449	43.5095
10.3516	43.748
10.3583	44
10.3649	44.238
10.3716	44.5055
10.3783	44.807
10.3849	45.1185
10.3916	45.4405
10.3983	45.747
10.4049	45.971
10.4116	46.163
10.4183	46.3455
10.4249	46.5105
10.4316	46.6765
10.4383	46.8175
10.4449	46.9265
10.4516	47.066
10.4583	47.2305
10.4649	47.4445
10.4716	47.6935
10.4783	47.9525
10.4849	48.2005
10.4916	48.461
10.4983	48.71
10.5049	48.9685
10.5116	49.212
10.5183	49.418
10.5249	49.5695
10.5316	49.6555
10.5383	49.739
10.545	49.826
10.5516	49.915
10.5583	50.0235
10.5649	50.115
10.5716	50.2385
10.5783	50.3795
10.5849	50.548
10.5916	50.744
10.5983	50.965
10.6049	51.186
10.6116	51.4085
10.6183	51.638
10.6249	51.8655
10.6316	52.0805
10.6383	52.266
10.6449	52.4295
10.6515	52.5545
10.6582	52.6755
10.6649	52.8005
10.6715	52.8945
10.6783	52.9905
10.6849	53.098
10.6916	53.1925
10.6982	53.3145
10.7049	53.473
10.7115	53.6595
10.7183	53.876
10.7249	54.093
10.7316	54.299
10.7382	54.51
10.7449	54.7055
10.7515	54.915
10.7583	55.1245
10.765	55.29
10.7716	55.407
10.7783	55.4825
10.785	55.5395
10.7916	55.631
10.7983	55.7435
10.8049	55.8565
10.8116	55.951
10.8182	56.0575
10.8249	56.19
10.8315	56.343
10.8383	56.51
10.8449	56.7095
10.8516	56.895
10.8582	57.1115
10.8649	57.328
10.8715	57.541
10.8783	57.7215
10.8849	57.8795
10.8916	57.9855
10.8982	58.074
10.9049	58.123
10.9115	58.189
10.9183	58.261
10.9249	58.316
10.9316	58.4025
10.9382	58.4745
10.9449	58.5765
10.9515	58.7075
10.9582	58.8695
10.9649	59.0385
10.9715	59.2195
10.9782	59.371
10.9849	59.537
10.9915	59.711
10.9982	59.9025
11.0049	60.077
11.0115	60.219
11.0182	60.3225
11.0249	60.3725
11.0315	60.4245
11.0382	60.498
11.0449	60.5725
11.0515	60.66
11.0582	60.7375
11.0649	60.8335
11.0715	60.932
11.0782	61.058
11.0849	61.208
11.0915	61.353
11.0982	61.512
11.1049	61.683
11.1115	61.8605
11.1182	62.044
11.1249	62.201
11.1315	62.334
11.1382	62.396
11.1449	62.4065
11.1515	62.427
11.1582	62.478
11.1649	62.5515
11.1715	62.636
11.1782	62.7095
11.1849	62.8045
11.1915	62.9085
11.1982	63.0215
11.2049	63.183
11.2115	63.3435
11.2182	63.5005
11.2249	63.6405
11.2315	63.7835
11.2384	63.9385
11.2449	64.0955
11.2515	64.238
11.2582	64.3605
11.2649	64.4445
11.2715	64.4875
11.2782	64.5355
11.285	64.6005
11.2915	64.6595
11.2982	64.7405
11.3049	64.789
11.3115	64.8365
11.3182	64.9265
11.3249	65.0375
11.3315	65.159
11.3382	65.299
11.3449	65.4355
11.3515	65.5665
11.3582	65.7165
11.3649	65.8725
11.3715	65.9905
11.3782	66.0935
11.3849	66.16
11.3915	66.2045
11.3982	66.244
11.4049	66.282
11.4116	66.317
11.4182	66.3745
11.425	66.4435
11.4315	66.509
11.4383	66.61
11.4449	66.7015
11.4516	66.829
11.4582	66.9555
11.4649	67.0665
11.4716	67.176
11.4782	67.3015
11.4849	67.426
11.4916	67.549
11.4982	67.6615
11.5049	67.7435
11.5116	67.787
11.5182	67.7965
11.5249	67.8205
11.5315	67.861
11.5382	67.907
11.5449	67.958
11.5516	68.013
11.5582	68.0575
11.5649	68.127
11.5715	68.2285
11.5782	68.355
11.5849	68.502
11.5915	68.6445
11.5982	68.762
11.6049	68.8785
11.6115	69.0025
11.6182	69.1005
11.6249	69.1885
11.6315	69.242
11.6382	69.2535
11.6449	69.259
11.6516	69.27
11.6582	69.3
11.6649	69.328
11.6715	69.3435
11.6782	69.3925
11.6849	69.4655
11.6915	69.533
11.6982	69.626
11.7049	69.7235
11.7116	69.844
11.7182	69.9345
11.7249	70.043
11.7316	70.1615
11.7382	70.258
11.7449	70.329
11.7515	70.3865
11.7582	70.4015
11.7649	70.4165
11.7715	70.423
11.7782	70.453
11.7849	70.474
11.7916	70.5145
11.7982	70.533
11.8049	70.567
11.8116	70.6155
11.8182	70.679
11.8249	70.7865
11.8316	70.875
11.8382	70.959
11.8449	71.0475
11.8515	71.1445
11.8582	71.229
11.8649	71.3065
11.8715	71.354
11.8782	71.4005
11.8849	71.415
11.8916	71.4125
11.8982	71.413
11.9049	71.4405
11.9116	71.4815
11.9182	71.5085
11.9249	71.55
11.9315	71.5805
11.9382	71.6455
11.9449	71.7025
11.9516	71.747
11.9582	71.8025
11.965	71.863
11.9716	71.95
11.9783	72.0575
11.9849	72.125
11.9916	72.1905
11.9982	72.23
12.0049	72.203
12.0115	72.2095
12.0182	72.1975
12.0249	72.2275
12.0315	72.2335
12.0382	72.2775
12.0449	72.2945
12.0516	72.3335
12.0582	72.363
12.0649	72.438
12.0716	72.519
12.0782	72.611
12.0849	72.6775
12.0915	72.7425
12.0982	72.7815
12.1049	72.85
12.1116	72.9095
12.1182	72.9405
12.1249	72.9495
12.1316	72.941
12.1382	72.918
12.1449	72.896
12.1516	72.876
12.1582	72.885
12.1649	72.8915
12.1716	72.9055
12.1782	72.93
12.1849	72.98
12.1916	73.0315
12.1982	73.093
12.2049	73.14
12.2116	73.195
12.2182	73.2595
12.2249	73.3575
12.2316	73.42
12.2382	73.4685
12.2449	73.475
12.2515	73.4635
12.2582	73.44
12.2648	73.45
12.2715	73.4585
12.2782	73.4515
12.2849	73.4195
12.2915	73.4135
12.2982	73.4395
12.3048	73.472
12.3116	73.519
12.3182	73.5905
12.3249	73.6585
12.3315	73.726
12.3382	73.76
12.3448	73.812
12.3516	73.876
12.3582	73.917
12.3649	73.949
12.3715	73.957
12.3782	73.9375
12.3849	73.9085
12.3916	73.883
12.3982	73.881
12.4049	73.9185
12.4115	73.9085
12.4182	73.932
12.4248	73.9545
12.4316	73.9995
12.4382	74.028
12.4449	74.0765
12.4515	74.133
12.4582	74.157
12.4648	74.239
12.4716	74.286
12.4782	74.329
12.4849	74.349
12.4915	74.3645
12.4982	74.344
12.5048	74.3205
12.5116	74.307
12.5182	74.2945
12.5249	74.292
12.5315	74.276
12.5382	74.2835
12.5448	74.2715
12.5516	74.2995
12.5582	74.3345
12.5649	74.384
12.5715	74.4395
12.5782	74.4645
12.5848	74.508
12.5916	74.5505
12.5982	74.575
12.6049	74.6255
12.6115	74.6605
12.6182	74.6145
12.6248	74.582
12.6316	74.569
12.6382	74.508
12.6449	74.517
12.6515	74.5025
12.6582	74.4835
12.6648	74.4875
12.6716	74.488
12.6782	74.512
12.6849	74.5365
12.6915	74.5795
12.6982	74.623
12.7048	74.6465
12.7116	74.683
12.7182	74.742
12.7249	74.761
12.7315	74.751
12.7382	74.7715
12.7448	74.7485
12.7516	74.7165
12.7582	74.6805
12.7649	74.648
12.7715	74.5915
12.7782	74.545
12.7848	74.489
12.7916	74.508
12.7982	74.539
12.8049	74.5785
12.8115	74.633
12.8182	74.67
12.8248	74.703
12.8316	74.734
12.8382	74.772
12.8449	74.807
12.8515	74.8195
12.8582	74.8415
12.8648	74.796
12.8716	74.7625
12.8782	74.6955
12.8849	74.644
12.8915	74.6185
12.8982	74.64
12.9048	74.628
12.9116	74.6055
12.9182	74.608
12.9249	74.6105
12.9315	74.631
12.9382	74.6405
12.9448	74.6415
12.9516	74.674
12.9582	74.7175
12.9649	74.755
12.9715	74.766
12.9782	74.758
12.9848	74.7415
12.9916	74.6755
12.9982	74.659
13.0049	74.625
13.0115	74.596
13.0182	74.583
13.0248	74.5265
13.0316	74.496
13.0382	74.4885
13.0449	74.493
13.0515	74.501
13.0582	74.519
13.0648	74.5385
13.0716	74.5555
13.0782	74.5595
13.0849	74.592
13.0915	74.6105
13.0982	74.619
13.1048	74.6
13.1116	74.5485
13.1182	74.485
13.1249	74.443
13.1315	74.4015
13.1382	74.3845
13.1448	74.372
13.1516	74.35
13.1582	74.3105
13.1649	74.301
13.1715	74.3015
13.1782	74.292
13.1848	74.3295
13.1915	74.3255
13.1982	74.3345
13.2048	74.341
13.2115	74.356
13.2182	74.376
13.2248	74.3585
13.2315	74.355
13.2382	74.2965
13.2448	74.249
13.2515	74.221
13.2582	74.159
13.2648	74.1155
13.2715	74.0595
13.2782	74.0455
13.2848	74.0275
13.2915	74.0205
13.2982	74.027
13.3048	74.0485
13.3115	74.053
13.3182	74.06
13.3248	74.0825
13.3315	74.095
[truncated: 2,930 more rows]
