# Supplementary material for: Solubilization, purification, and ligand binding characterization of G protein-coupled receptor SMO in native membrane bilayer using styrene maleic acid copolymer
Source: PeerJ. 2022 May 3;10:e13381. doi: 10.7717/peerj.13381 (PMC9074879; doi:10.7717/peerj.13381)
Supplement: Supplemental Information 7 [file peerj-10-13381-s007.xlsx]

## Sheet: Sheet1
X Volume	Record 10: A9 10mMtris300mMnacl 5mMkcl 1
0.4	0
0.463	0
0.536	0
0.621	0
0.719	0
0.833	0
0.965	0
1.12	0
1.29	0
1.5	0
1.74	0
2.01	0
2.33	0
2.7	0
3.12	0
3.62	0.327
4.19	3.11
4.85	9.57
5.61	16.1
6.5	18.9
7.53	17.6
8.72	13.8
10.1	9.49
11.7	5.72
13.5	3.02
15.7	1.37
18.2	0.508
21	0.138
24.4	0.0201
28.2	0.0039
32.7	0.0143
37.8	0.0235
43.8	0.0251
50.7	0.0207
58.8	0.014
68.1	0.00787
78.8	0.00361
91.3	0.00126
106	0.000287
122	2.91e-05
142	4.46e-05
164	0.000293
190	0.000956
220	0.00217
255	0.00396
295	0.00632
342	0.00924
396	0.0124
459	0.0151
531	0.017
615	0.0182
712	0.0179
825	0.0151
955	0.0101
1110	0.00502
1280	0.0016
1480	0.000237
1720	0
1990	0
2300	0
2670	0
3090	0
3580	0
4150	0
4800	0
5560	0
6440	0
7460	0
8630	0
