# Supplementary material for: Solubilization, purification, and ligand binding characterization of G protein-coupled receptor SMO in native membrane bilayer using styrene maleic acid copolymer
Source: PeerJ. 2022 May 3;10:e13381. doi: 10.7717/peerj.13381 (PMC9074879; doi:10.7717/peerj.13381)
Supplement: Supplemental Information 10 [file peerj-10-13381-s010.xlsx]

## Sheet: Sheet1
sant-1/smo binding
Protein concentration/nM	Normalized SMO binding
0	0	0	0
0.15	0.1082	0.26263	0.12237
0.3	0.11798	0.26906	0.19944
0.76	0.13135	0.38976	0.28429
1.52	0.08927	0.38946	0.33259
3.03	0.20024	0.52209	0.44511
7.58	0.43979	0.33766	0.47152
15.15	0.50501	0.54711	0.46284
30.3	0.67983	0.56794	0.57739
60.61	0.56223	0.79983	0.63736
121.21	0.67388	0.8988	0.86282
242.42	0.70658	0.90538	0.89051
sag/smo binding
0	0	0	0
0.11	0.05727	-0.0226	0.01481
0.3	0.0514	-0.03859	0.01816
0.91	0.08306	-0.00873	0.08125
1.52	0.20421	0.10064	0.16258
3.03	0.23763	0.14061	0.14384
7.58	0.50362	0.48081	0.28183
15.15	0.72618	0.69344	0.40333
30.3	0.834	0.72476	0.86592
60.61	0.94397	0.94874	0.95544
121.21	0.97354	0.98361	0.98665
